# Supplementary material
Source: Springer Nature journal article supplement (https://www.springermedizin.de/resource/supplementary/12891_2008_676_MOESM4_ESM.pdf/9506544)

|                              | SES         | 95%         | CI          |
|------------------------------|-------------|-------------|-------------|
| <b>Study (original data)</b> |             |             |             |
| Jan - level free             | 0.47        | -0.09       | 1.02        |
| Jan - level fast             | 1.03        | 0.44        | 1.61        |
| Jan - grass free             | 0.72        | 0.15        | 1.29        |
| Jan - grass fast             | 1.19        | 0.59        | 1.78        |
| Jan - sponge free            | 0.55        | -0.01       | 1.11        |
| Nyberg self speed            | -0.35       | -1.05       | 0.36        |
| Nyberg max speed             | -0.36       | -1.06       | 0.34        |
| Patterson                    | 1.03        | 0.04        | 2.02        |
| Sashika group 1              | 0.44        | -0.60       | 1.49        |
| Sashika group 2              | 0.89        | -0.19       | 1.98        |
| Sashika groups 1 and 2       | 0.71        | -0.22       | 1.64        |
| <b>Study (summarised)</b>    |             |             |             |
| Patterson                    | 1.03        | 0.04        | 2.02        |
| Sashika groups 1 and 2       | 0.71        | -0.22       | 1.64        |
| Nyberg                       | -0.35       | -1.02       | 0.31        |
| Jan                          | 0.64        | 0.12        | 1.16        |
| <b>Summary, r=0.8</b>        | <b>0.42</b> | <b>0.07</b> | <b>0.77</b> |
| <b>Summary, r=0.2</b>        | <b>0.51</b> | <b>0.25</b> | <b>0.78</b> |
| <b>Summary, r=0.5</b>        | <b>0.47</b> | <b>0.15</b> | <b>0.79</b> |

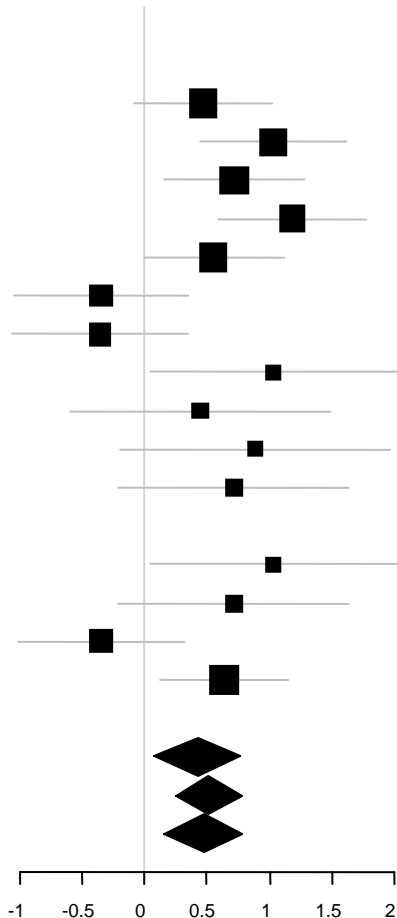

Supplement: MOESM4 [file 9506544]
